# Supplementary material for: Haptic Feedback in Violin Education: A Case Study of Robotic Exoskeleton-Mediated Motor Learning
Source: Research Square preprint supplement (doi:10.21203/rs.3.rs-6085944/v1), 2025-10-18
Supplement: Supplementary file [file f5520d89123531bf7e2f9bc3.pdf]

**Legend Supplementary Materials:**

- Ex1.mov: The teacher demonstrates Exercise 1. This video is used for baseline and recall measurements.
- Ex2.mov: The teacher demonstrates Exercise 2. This video is used for baseline and recall measurements.
- Ex3.mov: The teacher demonstrates Exercise 3. This video is used for baseline and recall measurements.
- Training.mov: The full lesson as presented to participants. The teacher demonstrates basic violin technique and the correct performance of Exercises 1, 2, and 3. This video is used for training measurements.
- Questionnaires\_AVE\_Group.xlsx: Contains all questionnaires used for the AVE group, including the responses of all AVE participants.
- Questionnaires\_AV\_Group.xlsx: Contains all questionnaires used for the AV group, including the responses of all AV participants.
